# Supplementary material for: Structural basis for snRNA recognition by the double-WD40 repeat domain of Gemin5
Source: PubMed Central journal article supplement — Genes Dev. 2016 Nov 1;30(21):2391–403. doi: 10.1101/gad.291377.116 (PMC5131779; doi:10.1101/gad.291377.116), 2016-11-01
Supplement: supp_gad.291377.116_Supplemental_Data.pdf [file supp_gad.291377.116_Supplemental_Data.pdf]

*Supplementary Data*

**Structural basis for snRNA recognition by the double WD40-repeat domain of Gemin5**

Wenxing Jin<sup>1+</sup>, Yi Wang<sup>1,2+</sup>, Chao-Pei Liu<sup>1+</sup>, Na Yang<sup>1,2</sup>, Mingliang Jin<sup>2,3</sup>, Yao Cong<sup>3</sup>,  
Mingzhu Wang<sup>1\*</sup>, Rui-Ming Xu<sup>1,2\*</sup>

<sup>1</sup>National Laboratory of Biomacromolecules, CAS Center for Excellence in Biomacromolecules, Institute of Biophysics, Chinese Academy of Sciences, Beijing 100101, China; <sup>2</sup>University of Chinese Academy of Sciences, Beijing 100049, China; <sup>3</sup>National Center for Protein Science Shanghai, State Key Laboratory of Molecular Biology, Institute of Biochemistry and Cell Biology, Shanghai Institutes for Biological Sciences, Chinese Academy of Sciences, Shanghai 201210, China

Figure S1. Two G5N-RNA complexes in one crystallographic asymmetric unit.

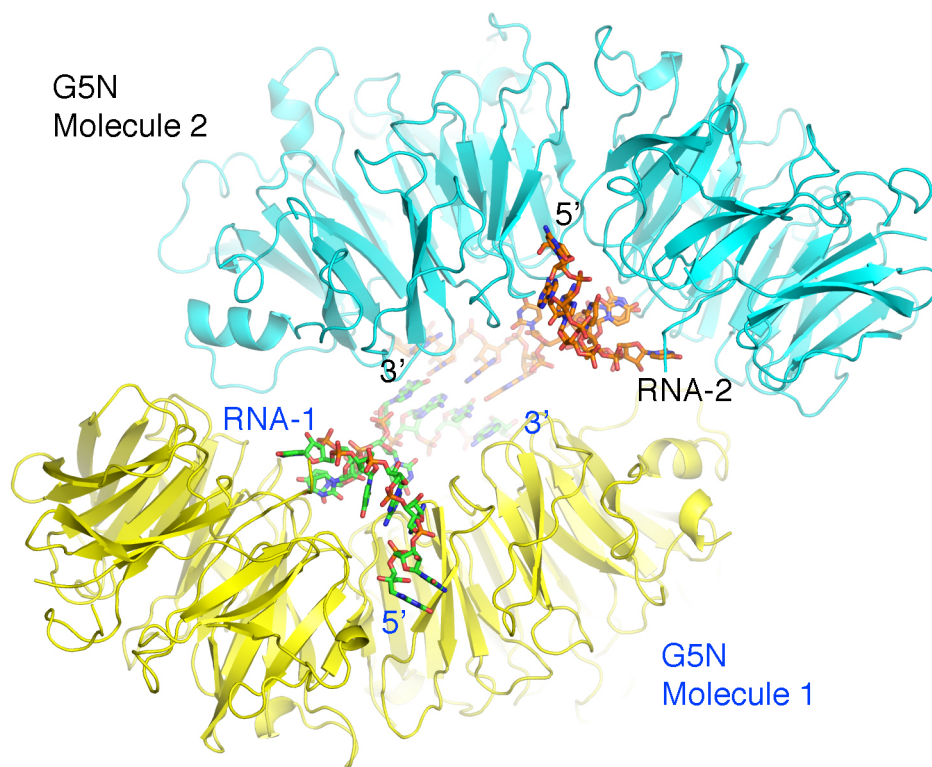Figure S2. Simulated annealing omit difference electron density map of the bound RNA molecule. The  $F_o - F_c$  map is contoured at  $3\sigma$  level. A stick model of the RNA molecule is superimposed.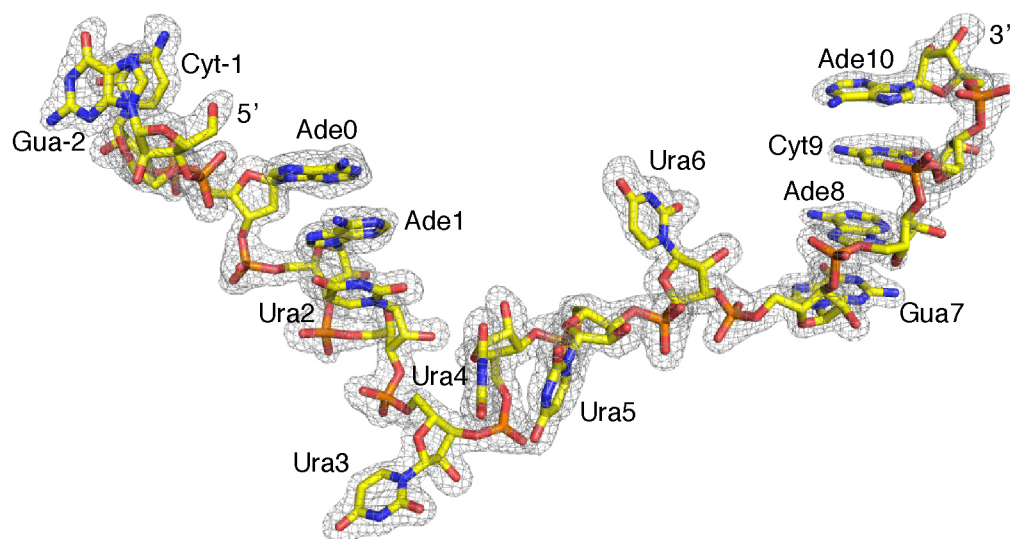

Table\_S1. Statistics of crystallographic analyses

|                                           | K <sub>2</sub> Pt(NO <sub>2</sub> ) <sub>4</sub><br>derivative | Native                    | G5N-13nt RNA<br>(cocrystallization)           | G5N-7nt RNA<br>(soak)     | G5N-m7GTP<br>(soak)       |
|-------------------------------------------|----------------------------------------------------------------|---------------------------|-----------------------------------------------|---------------------------|---------------------------|
| <b>Data collection</b>                    |                                                                |                           |                                               |                           |                           |
| Space group                               | P2 <sub>1</sub>                                                | P2 <sub>1</sub>           | P2 <sub>1</sub> 2 <sub>1</sub> 2 <sub>1</sub> | P2 <sub>1</sub>           | P2 <sub>1</sub>           |
| Cell dimensions                           |                                                                |                           |                                               |                           |                           |
| a, b, c (Å)                               | 59.61, 124.70, 61.64                                           | 60.26, 123.59, 61.73      | 98.65, 107.19, 151.48                         | 59.54, 124.79, 61.02      | 60.53, 120.91, 61.26      |
| α, β, γ (°)                               | 90, 118.70, 90                                                 | 90, 119.27, 90            | 90, 90, 90                                    | 90, 117.97, 90            | 90, 117.42, 90            |
| Wavelength (Å)                            | 0.9786                                                         | 0.9786                    | 0.9792                                        | 0.9785                    | 0.9788                    |
| Resolution (Å)                            | 50.00-3.00<br>(3.11-3.00)                                      | 50.00-2.00 (2.07-2.00)    | 50.00-1.90 (1.97-1.90)                        | 50.00-2.10 (2.18-2.10)    | 50.00-2.50 (2.59-2.50)    |
| Rmerge                                    | 0.143 (0.699)                                                  | 0.116 (0.504)             | 0.116 (0.683)                                 | 0.090 (0.533)             | 0.070 (0.609)             |
| I / σI                                    | 12 (3.0)                                                       | 11.5 (2.6)                | 17.4 (2.8)                                    | 13.0 (2.8)                | 15.9 (2.1)                |
| Completeness (%)                          | 100.0 (100.0)                                                  | 99.9 (99.9)               | 99.7 (99.0)                                   | 99.7 (99.7)               | 99.1(99.6)                |
| Redundancy                                | 6.9 (6.8)                                                      | 4.8 (4.8)                 | 7.9 (7.9)                                     | 3.4 (3.4)                 | 3.3(3.3)                  |
| Total/Unique reflections                  | 215832/31097                                                   | 255144/53257              | 1002669/126392                                | 152592/45763              | 88710/26965               |
| <b>Refinement</b>                         |                                                                |                           |                                               |                           |                           |
| Resolution (Å)                            |                                                                | 50.00-2.00 (2.03-2.00)    | 50.00-1.90 (1.95-1.90)                        | 50.00-2.10 (2.15-2.10)    | 50.00-2.50 (2.58-2.50)    |
| No. reflections                           |                                                                | 52884 (2466)              | 125759 (8413)                                 | 45665 (2849)              | 26936 (2527)              |
| Rwork / Rfree                             |                                                                | 0.157(0.200)/0.199(0.242) | 0.170(0.242)/0.206(0.298)                     | 0.195(0.333)/0.241(0.354) | 0.183(0.241)/0.234(0.296) |
| No. atoms,<br>B-factors (Å <sup>2</sup> ) |                                                                |                           |                                               |                           |                           |
| Protein                                   |                                                                | 5509, 28.1 Å <sup>2</sup> | 10899, 24.0 Å <sup>2</sup>                    | 5378, 34.5 Å <sup>2</sup> | 5319, 70.9 Å <sup>2</sup> |
| RNA                                       |                                                                |                           | 522, 22.7 Å <sup>2</sup>                      | 142, 54.5 Å <sup>2</sup>  |                           |
| Ligand                                    |                                                                |                           |                                               | 6, 29.4 Å <sup>2</sup>    | 29, 86.8 Å <sup>2</sup>   |
| Water                                     |                                                                | 623, 35.3 Å <sup>2</sup>  | 1330, 33.3 Å <sup>2</sup>                     | 417, 38.7 Å <sup>2</sup>  | 33, 58.4 Å <sup>2</sup>   |
| R.m.s deviations                          |                                                                |                           |                                               |                           |                           |
| Bond length (Å)                           |                                                                | 0.005                     | 0.009                                         | 0.005                     | 0.003                     |
| Bond angles (°)                           |                                                                | 0.911                     | 1.256                                         | 0.936                     | 0.661                     |
| Ramachandran plot                         |                                                                |                           |                                               |                           |                           |
| Favored                                   |                                                                | 96.5%                     | 96.3%                                         | 95.5%                     | 97.3%                     |
| Allowed                                   |                                                                | 3.5%                      | 3.7%                                          | 4.5%                      | 2.6%                      |
| Outliers                                  |                                                                | 0                         | 0                                             | 0                         | 0.1%                      |
